# Supplementary material for: The Spectrum of Cognitive Dysfunction in Amyotrophic Lateral Sclerosis: An Update
Source: MDPI journal article supplement (doi:10.3390/ijms241914647), 2023-09-27
Supplement: s1 [file s1]

**Table S1.** Brain network dysfunctions in ALSci.

| Involved network                                                                                                                                                                                                                                           | References              |
|------------------------------------------------------------------------------------------------------------------------------------------------------------------------------------------------------------------------------------------------------------|-------------------------|
| Limbo-thalamo-cortical pathway                                                                                                                                                                                                                             | [106]                   |
| Fronto-striatal network                                                                                                                                                                                                                                    | [103]                   |
| Motor and cognitive network                                                                                                                                                                                                                                | [122]                   |
| DMN connectivity                                                                                                                                                                                                                                           | [120,121]               |
| Inferior frontal-occipital connection;<br>corpus callosum, uncinate fasciculi                                                                                                                                                                              | [98]                    |
| Bilateral corticospinal tract & corpus callosum                                                                                                                                                                                                            | [96]                    |
| Superior longitudinal fasciculi and corpus callosum / reduced<br>FC in sensorimotor cortex-resting state network, frontal pole,<br>bilateral thalamus-visual cortex network, increased FC in left<br>primary motor cortex and left fronto-parietal network | [85]                    |
| Superior longitudinal & inferior fronto-occipital fasciculi                                                                                                                                                                                                | [93]                    |
| Frontotemporal & hippocampal white matter tracts                                                                                                                                                                                                           | [96]                    |
| Frontal functional network                                                                                                                                                                                                                                 | [124]                   |
| Frontal and global network                                                                                                                                                                                                                                 | [122]                   |
| Multimodal cortico-basal ganglia network                                                                                                                                                                                                                   | [128]                   |
| Fronto-striatal and fronto-temporal circuit                                                                                                                                                                                                                | [133]                   |
| Fronto-striatal and fronto-parietal circuit                                                                                                                                                                                                                | [137]                   |
| Basal ganglia - frontal lobe & limbic circuits                                                                                                                                                                                                             | [129,131]               |
| Medial cingulate gyrus - prefrontal circuit                                                                                                                                                                                                                | [134]                   |
| Bilateral motor and fronto-temporal cortex                                                                                                                                                                                                                 | [138]                   |
| Reduced FC: bilateral hippocampus, parahippocampal gyrus,<br>posterior cingulate gyrus (Papez circuit)                                                                                                                                                     | [99]                    |
| Increased FC: sensorimotor, default mode, bilateral fronto-<br>parietal and orbitofrontal networks                                                                                                                                                         | [129]                   |
| Increased FC: limbic, DMN, salient/ventral attention + fronto-<br>parietal networks<br>Decreased FC: limbic and subcortical network                                                                                                                        | [130]                   |
| Corpus callosum, cingulum, inferior longitudinal, inferior<br>fronto-occipital and uncinate fasciculus                                                                                                                                                     | [139]                   |
| Fronto-parietal and salience networks, DMN and SMN                                                                                                                                                                                                         | [141]                   |
| DMN-somatomotor-frontoparietal and salience network                                                                                                                                                                                                        | [142]                   |
| Fronto-tempo-parietal-cerebellar circuits                                                                                                                                                                                                                  | [221]                   |
| Reduced FC:<br>Sensorimotor, DMV, frontoparietal & orbitofrontal<br>Frontoparietal & sensorimotor network<br>Frontoparietal, frontotemporal & resting state network                                                                                        | [129]<br>[222]<br>[138] |
| Increased FC (initial):<br>Middel & superior frontal, frontoparietal, frontostriatal network<br>Decreased FC (later):<br>Between medial frontal gyrus & parietal regions                                                                                   | [137]                   |

ALSci: amyotrophic lateral sclerosis with cognitive impairment; FC: functional connectivity;  
DMN: default mode network; SMN: sensorimotor network
